# Supplementary material
Source: PubMed Central journal article supplement (PMC6775044)

# Supplementary Figure 1

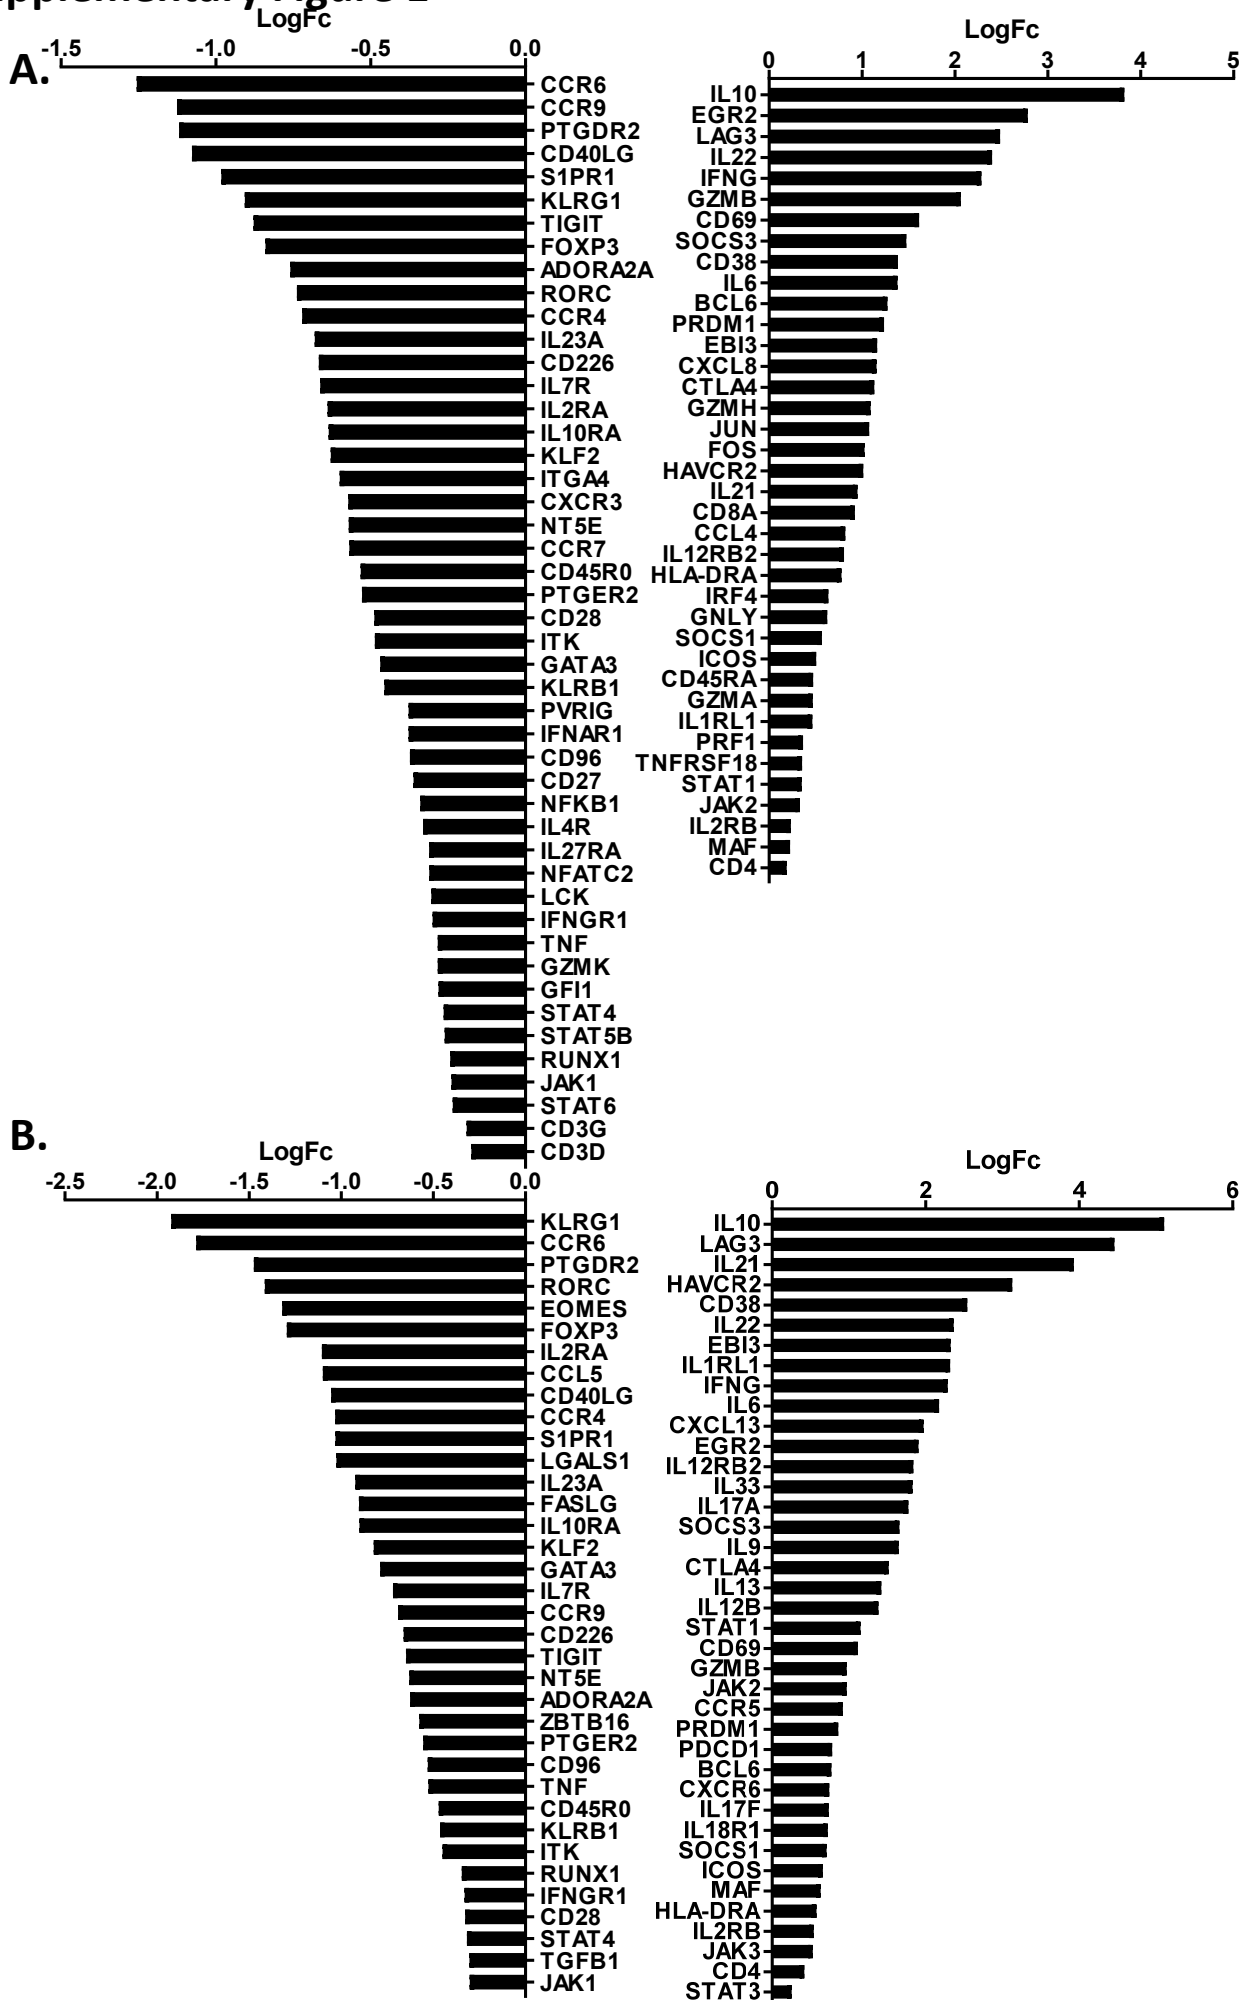

C.

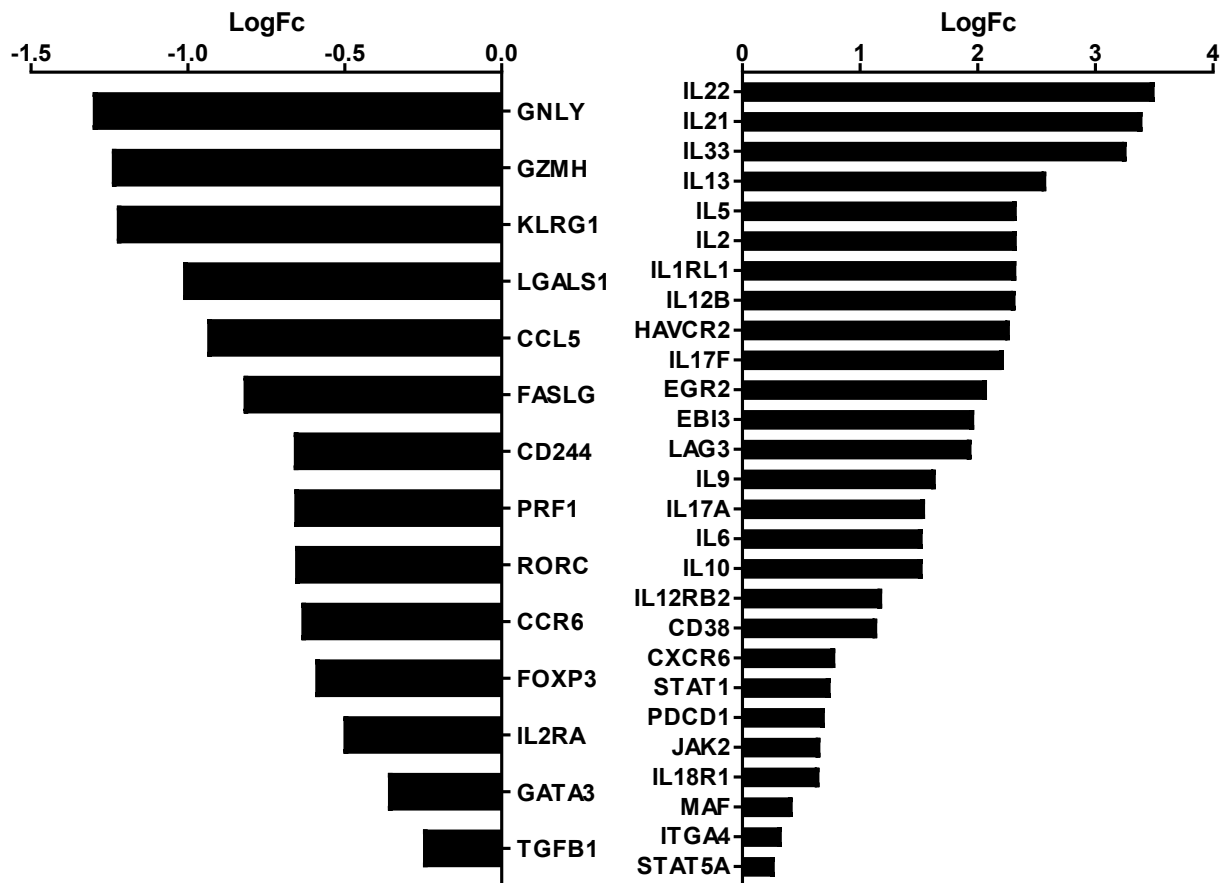

Supplement: jiz074_suppl_supplementary_figure_1.pdf [file jiz074_suppl_supplementary_figure_1.pdf]
